# Supplementary material for: Airline Point-of-Care System on Seat Belt for Hybrid Physiological Signal Monitoring
Source: MDPI journal article supplement (doi:10.3390/mi13111880), 2022-11-01
Supplement: s1 [file s1]

# Supplementary Information: Airline Point-of-Care System on Seat Belt for Hybrid Physiological Signal Monitoring

Xiaoqiang Ji <sup>1,†</sup>, Zhi Rao <sup>1,†</sup>, Wei Zhang <sup>2,†</sup>, Chang Liu <sup>3</sup>, Zimo Wang <sup>3</sup>, Shuo Zhang <sup>1</sup>, Butian Zhang <sup>4</sup>, Menglei Hu <sup>5,\*</sup>, Peyman Servati <sup>5</sup>, Xiao Xiao <sup>6,\*</sup>

<sup>1</sup> School of Life Science and Technology, Changchun University of Science and Technology, Changchun 130022, China

<sup>2</sup> Department of Biomedical Engineering, College of Design and Engineering, National University of Singapore, Singapore 117583, Singapore

<sup>3</sup> Department of Materials Science and Engineering, College of Design and Engineering, National University of Singapore, Singapore 117583, Singapore

<sup>4</sup> China Japan Union Hospital of Jilin University, Changchun 130033, China

<sup>5</sup> Department of Electrical and Computer Engineering, University of British Columbia, Vancouver, BC V6T 1Z4, Canada

<sup>6</sup> Department of Electrical and Computer Engineering, College of Design and Engineering, National University of Singapore, Singapore 117583, Singapore

\* Correspondence: mengleih@ece.ubc.ca; xiao.xiao@u.nus.edu.

† These authors contributed equally to this work.

**Table S1.** The Screening Model Test Results

| Number of subject | Simulated normal state (minutes) | Simulated apnea (minutes) | Correctly detected by the model at the normal state (minutes) | Correctly detected by the model at the apnea state (minutes) |
|-------------------|----------------------------------|---------------------------|---------------------------------------------------------------|--------------------------------------------------------------|
| Male 1            | 140                              | 40                        | 121                                                           | 34                                                           |
| Male 2            | 134                              | 46                        | 112                                                           | 34                                                           |
| Male 3            | 128                              | 52                        | 108                                                           | 46                                                           |
| Male 4            | 117                              | 63                        | 98                                                            | 52                                                           |
| Male 5            | 124                              | 56                        | 102                                                           | 41                                                           |
| Male 6            | 141                              | 39                        | 118                                                           | 32                                                           |
| Male 7            | 114                              | 66                        | 105                                                           | 43                                                           |
| Male 8            | 130                              | 50                        | 114                                                           | 38                                                           |
| Male 9            | 140                              | 40                        | 118                                                           | 33                                                           |
| Female 1          | 145                              | 35                        | 123                                                           | 25                                                           |
| Female 2          | 135                              | 45                        | 113                                                           | 38                                                           |
| Female 3          | 132                              | 48                        | 118                                                           | 41                                                           |
| Female 4          | 143                              | 37                        | 119                                                           | 30                                                           |
| Female 5          | 123                              | 57                        | 106                                                           | 46                                                           |
| Female 6          | 120                              | 60                        | 100                                                           | 47                                                           |
| Female 7          | 133                              | 47                        | 113                                                           | 41                                                           |
| Female 8          | 125                              | 55                        | 98                                                            | 48                                                           |
| Female 9          | 127                              | 53                        | 112                                                           | 41                                                           |
| Average           | 130.61                           | 49.39                     | 111                                                           | 39.44                                                        |

**Table S2.** Loss/accuracy versus epoch for train and validation sets.

| epoch | train_acc | train_loss | validation_acc | validation_loss |
|-------|-----------|------------|----------------|-----------------|
| 1     | 0.720068  | 0.5551379  | 0.7746267      | 0.464238003     |
| 2     | 0.79807   | 0.4504302  | 0.808508       | 0.443691787     |
| 3     | 0.802456  | 0.4377426  | 0.79966116     | 0.440567849     |
| 4     | 0.81862   | 0.4096381  | 0.8068139      | 0.454980261     |
| 5     | 0.830524  | 0.3846521  | 0.82595056     | 0.386880132     |
| 6     | 0.830524  | 0.3734832  | 0.8171665      | 0.401154585     |
| 7     | 0.840549  | 0.3684623  | 0.82971513     | 0.381569703     |
| 8     | 0.850949  | 0.3462507  | 0.8383737      | 0.367486143     |
| 9     | 0.851638  | 0.347045   | 0.83655417     | 0.370268121     |

**Apnea-ECG Database****Description**

The data consist of 70 records, divided into a learning set of 35 records (a01 through a20, b01 through b05, and c01 through c10), and a test set of 35 records (x01 through x35), all of which may be downloaded from this page. Recordings vary in length from slightly less than 7 hours to nearly 10 hours each. Each recording includes a continuous digitized ECG signal, a set of apnea annotations (derived by human experts on the basis of simultaneously recorded respiration and related signals), and a set of machine-generated QRS annotations (in which all beats regardless of type have been labeled normal). In addition, eight recordings (a01 through a04, b01, and c01 through c03) are accompanied by four additional signals (Resp C and Resp A, chest and abdominal respiratory effort signals obtained using inductance plethysmography; Resp N, oronasal airflow measured using nasal thermistors; and SpO2, oxygen saturation). More information about Apnea-ECG databas : <https://physionet.org/content/challenge-2000/1.0.0/>

**Label**

One annotation per minute is used to indicate the presence or absence of apnea in that minute. One minute was used as the criterion for segmentation, i.e., one hour was segmented into 60 segments, and the labelling was based on whether apnea was present in each segment: if apnea was present in a minute segment (no matter how many times), the labelling was A; if no apnea was present, the labelling was N.

**Note:** These reference notes were made by human experts on the basis of a combination of Resp C for chest breathing, Resp A to indicate abdominal breathing, Resp N for oral and nasal airflow, and SpO2 for blood oxygen saturation.

**Table S3.** Comparison of different methods in terms of accuracy

| Methods  | Accuracy |
|----------|----------|
| SVM      | 0.78747  |
| RFC      | 0.80586  |
| DTC      | 0.78747  |
| KNN      | 0.7454   |
| ADAbosst | 0.72172  |
| GNB      | 0.66064  |
| QDA      | 0.59488  |
| BP       | 0.6061   |

**Table S4.** Classifier evaluations index

| Parameters | Equations                                           |
|------------|-----------------------------------------------------|
| Se         | $Se = \frac{TP}{TP + FN}$                           |
| Sp         | $SP = \frac{TN}{TN + FP}$                           |
| +PV        | $+PV = \frac{TP}{TP + FP}$                          |
| Acc        | $Acc = \frac{TP + FN + TN + FP}{TP + FN + TN + FP}$ |
| F-score    | $F = \frac{2 \times Se \times Sp}{Se + Sp}$         |

**Table S5.** Cost of each component for the point-of-care system in detail.

| Item      | Belt | PCB  | Sensors | Fabrication | Total  |
|-----------|------|------|---------|-------------|--------|
| Cost (\$) | 2.2  | 2.63 | 150.62  | 6.01        | 161.46 |

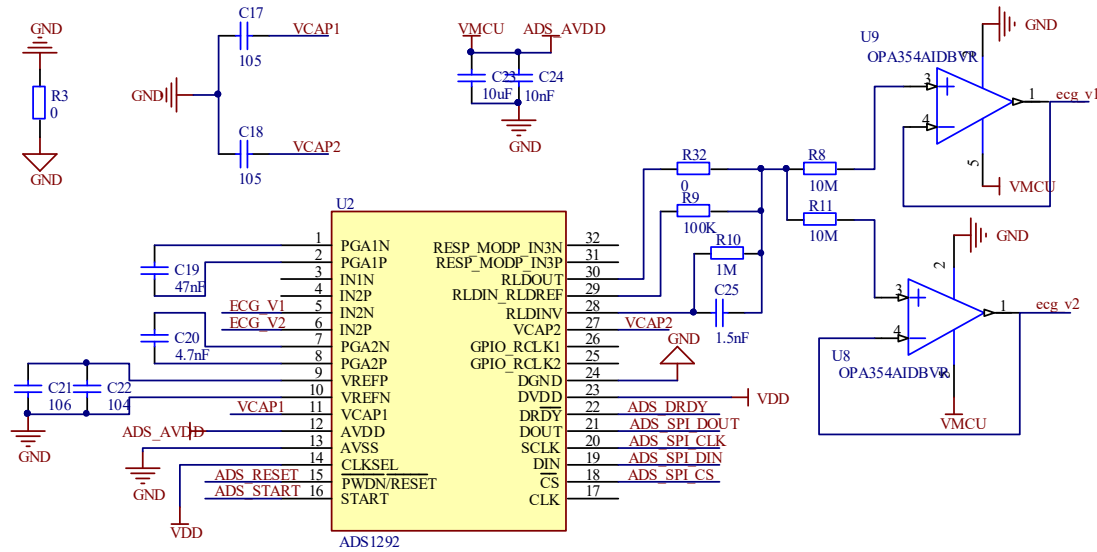

**Figure S1** Pin configuration and peripheral circuit diagram of ADS1292

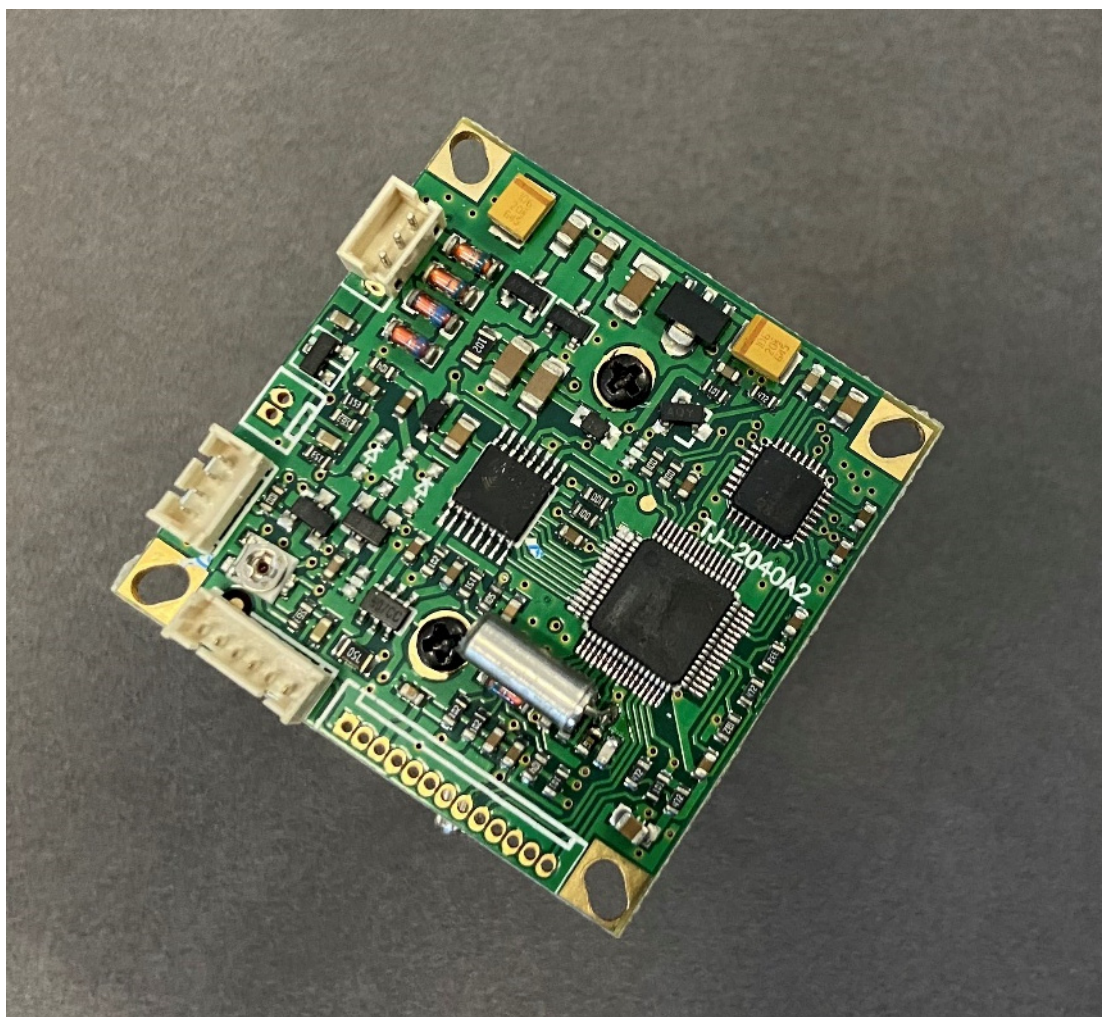

**Figure S2** Photo of fabricated PCB
